# Supplementary material for: Ionic liquid surfactant-derived carbon micro/nanostructures toward application of supercapacitors
Source: Royal Society of Chemistry journal article supplement (doi:10.1039/d1qi01570b), 2022-01-01
Supplement: d1qi01570b1.pdf [file d1qi01570b1.pdf]

## Supporting Information

### Ionic liquid surfactant-derived carbon micro/nanostructures toward application for supercapacitors

*Weizheng Li<sup>a</sup>, Qiang Gao<sup>a</sup>, Ming Shen<sup>a,\*</sup>, Bingyu Li<sup>a</sup>, Chuanli Ren<sup>b</sup>, Jun Yang<sup>c,\*</sup>*

**Table S1.** EDX element composition analysis result of NMHCSs-1.2-55-0.

| Element | NMHCSs-1.2-55-0 (wt.%) |       |       | NMHCSs-1.2-55-0 (at.%) |       |       |
|---------|------------------------|-------|-------|------------------------|-------|-------|
|         | a                      | b     | c     | a                      | b     | c     |
| C       | 94.04                  | 93.09 | 91.66 | 95.14                  | 94.37 | 93.31 |
| N       | 3.07                   | 3.46  | 3.93  | 2.66                   | 3.01  | 3.42  |
| O       | 2.88                   | 3.43  | 4.39  | 2.19                   | 2.61  | 3.35  |

**Table S2.** Fluorescence spectral data of solubilized pyrene under different molar concentration of 3-aminophenol.

| curve | c(3-aminophenol) /<br>(mmol · L <sup>-1</sup> ) | $\lambda_1$ /nm | $\lambda_3$ /nm | I <sub>1</sub> | I <sub>3</sub> | I <sub>1</sub> /I <sub>3</sub> |
|-------|-------------------------------------------------|-----------------|-----------------|----------------|----------------|--------------------------------|
| 0     | 0.00                                            | 372.8           | 383.7           | 10050          | 7473           | 1.345                          |
| 1     | 9.16                                            | 372.8           | 383.6           | 7870           | 5859           | 1.343                          |
| 2     | 18.33                                           | 372.8           | 383.7           | 3345           | 2523           | 1.326                          |
| 3     | 27.49                                           | 372.8           | 383.7           | 1835           | 1387           | 1.323                          |
| 4     | 36.65                                           | 372.8           | 383.6           | 1361           | 1040           | 1.308                          |
| 5     | 45.82                                           | 372.8           | 383.6           | 821            | 639            | 1.285                          |
| 6     | 54.98                                           | 372.8           | 383.6           | 859            | 670            | 1.282                          |
| 7     | 64.14                                           | 372.8           | 383.6           | 645            | 508            | 1.270                          |
| 8     | 73.31                                           | 372.8           | 383.7           | 503            | 402            | 1.251                          |
| 9     | 82.47                                           | 372.8           | 383.6           | 339            | 278            | 1.219                          |
| 10    | 91.63                                           | 372.8           | 383.7           | 325            | 272            | 1.195                          |

**Table S3.** Elemental compositions of C, N, and O, and relative contents of nitrogen species to N 1s in NMHCSs, NMHCSs-b and A-NMHCSs.

| Sample           | C<br>(at.%) | N<br>(at.%) | O<br>(at.%) | N-6 (%)<br>398.3eV | N-5(%)<br>399.8eV | N-Q(%)<br>401.0eV | N-OX(%)<br>402.6eV |
|------------------|-------------|-------------|-------------|--------------------|-------------------|-------------------|--------------------|
| NMHCSs-1.2-55-6  | 87.17       | 6.72        | 4.48        | 37.90              | 10.90             | 38.40             | 12.70              |
| NMHCSs-b         | 90.24       | 3.14        | 5.31        | 28.90              | 3.10              | 62.80             | 5.20               |
| NMHCSs-1.0-55-6  | 82.08       | 6.02        | 8.53        | 15.27              | 12.55             | 60.88             | 11.30              |
| NMHCSs-0.8-55-6  | 85.62       | 5.30        | 6.94        | 23.16              | 14.07             | 52.38             | 10.39              |
| NMHCSs-0.6-55-6  | 83.47       | 6.85        | 6.35        | 22.73              | 10.91             | 59.32             | 7.04               |
| NMHCSs-0.4-50-25 | 82.16       | 6.77        | 8.74        | 18.46              | 10.25             | 60.43             | 10.86              |
| A-NMHCSs         | 74.25       | 2.92        | 14.07       | -                  | -                 | -                 | -                  |

**Table S4.** Specific capacitances ( $F g^{-1}$ ) of NMHCSs-based electrodes at different current densities.

| Sample           | 0.2 A g <sup>-1</sup><br>1 | 1 A g <sup>-1</sup><br>1 | 3 A g <sup>-1</sup> | 5 A g <sup>-1</sup> | 10 A g <sup>-1</sup> | 15 A g <sup>-1</sup><br>1 | 20 A g <sup>-1</sup><br>1 |
|------------------|----------------------------|--------------------------|---------------------|---------------------|----------------------|---------------------------|---------------------------|
| NMHCSs-0.6-55-6  | 176                        | 157                      | 143                 | 137                 | 126                  | 120                       | 112                       |
| NMHCSs-1.2-55-6  | 184                        | 166                      | 149                 | 145                 | 136                  | 132                       | 128                       |
| NMHCSs-1.2-55-0  | 198                        | 184                      | 164                 | 155                 | 145                  | 137                       | 132                       |
| NMHCSs-1.2-95-0  | 201                        | 187                      | 166                 | 161                 | 151                  | 145                       | 142                       |
| NMHCSs-1.2-55-15 | 176                        | 155                      | 139                 | 132                 | 120                  | 114                       | 104                       |
| NMHCSs-0.4-55-15 | 138                        | 117                      | 101                 | 93                  | 92                   | 75                        | 72                        |
| NMHCSs-0.4-50-25 | 218                        | 203                      | 184                 | 179                 | 171                  | 166                       | 160                       |
| NMHCSs-0.4-25-50 | 211                        | 195                      | 174                 | 165                 | 142                  | 125                       | 105                       |
| A-NMHCSs         | 308                        | 291                      | 263                 | 254                 | 246                  | 238                       | 233                       |

**Table S5.** Comparison of specific surface area, pore volume and EDLCs specific capacitance for sample A-NMHCSs with previous reported carbon materials.

| Samples         | $S_{\text{BET}}$<br>( $\text{m}^2 \text{g}^{-1}$ ) | Pore<br>volume<br>( $\text{cm}^3 \text{g}^{-1}$ ) | Capacitance<br>( $\text{F g}^{-1}$ ) | Current<br>density     | Electrolyte                        | Ref.         |
|-----------------|----------------------------------------------------|---------------------------------------------------|--------------------------------------|------------------------|------------------------------------|--------------|
| A-NMHCSs        | 1906                                               | 1.43                                              | 308                                  | 0.2 $\text{A g}^{-1}$  | 6 M KOH                            | This<br>work |
|                 |                                                    |                                                   | 293                                  | 0.5 $\text{A g}^{-1}$  |                                    |              |
|                 |                                                    |                                                   | 291                                  | 1 $\text{A g}^{-1}$    |                                    |              |
|                 |                                                    |                                                   | 254                                  | 5 $\text{A g}^{-1}$    |                                    |              |
|                 |                                                    |                                                   | 246                                  | 10 $\text{A g}^{-1}$   |                                    |              |
|                 |                                                    |                                                   | 233                                  | 20 $\text{A g}^{-1}$   |                                    |              |
|                 |                                                    |                                                   | 208                                  | 50 $\text{A g}^{-1}$   |                                    |              |
|                 |                                                    |                                                   | 174                                  | 100 $\text{A g}^{-1}$  |                                    |              |
| GWAC            | 2134                                               | 1.01                                              | 150                                  | 0.25 $\text{A g}^{-1}$ | TEABF <sub>4</sub>                 | 1            |
| PC -Cs/CNTs     | 804                                                | 0.8                                               | 102.5                                | 0.5 $\text{A g}^{-1}$  | 6 M KOH                            | 2            |
| DUT-108         | 750                                                | 0.38                                              | 192                                  | 0.2 $\text{A g}^{-1}$  | 1 M NaCl                           | 3            |
| PANI/CNO        | 18                                                 | /                                                 | 196                                  | 1 $\text{A g}^{-1}$    | 1 M H <sub>2</sub> SO <sub>4</sub> | 4            |
| FL-CNSs         | 779                                                | /                                                 | 60.5                                 | 0.05 $\text{V s}^{-1}$ | 1 M TEABF <sub>4</sub>             | 5            |
| SPHA-ac-700-2   | 1900                                               | 1.15                                              | 271                                  | 1 $\text{A g}^{-1}$    | 6 M KOH                            | 6            |
| 3D-MCA          | 1750                                               | /                                                 | 148.6                                | 5 $\text{mV s}^{-1}$   | 0.5 M<br>TEABF <sub>4</sub>        | 7            |
| CBC-800         | 861                                                | 0.861                                             | 233.5                                | 0.2 $\text{A g}^{-1}$  | 6 M KOH                            | 8            |
| biomass-derived | /                                                  | /                                                 | 170                                  | 0.5 $\text{A g}^{-1}$  | 1 M H <sub>2</sub> SO <sub>4</sub> | 9            |

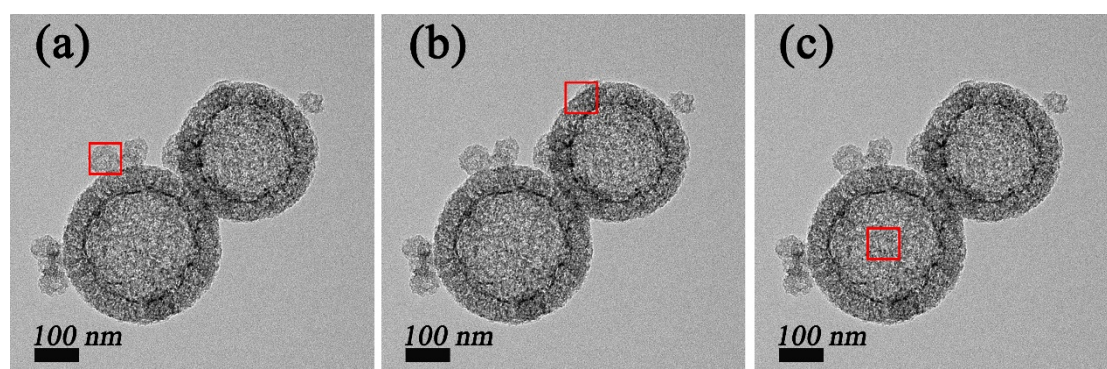

**Figure S1.** EDX elemental analysis of NMHCSs-1.2-55-0 nanospheres.

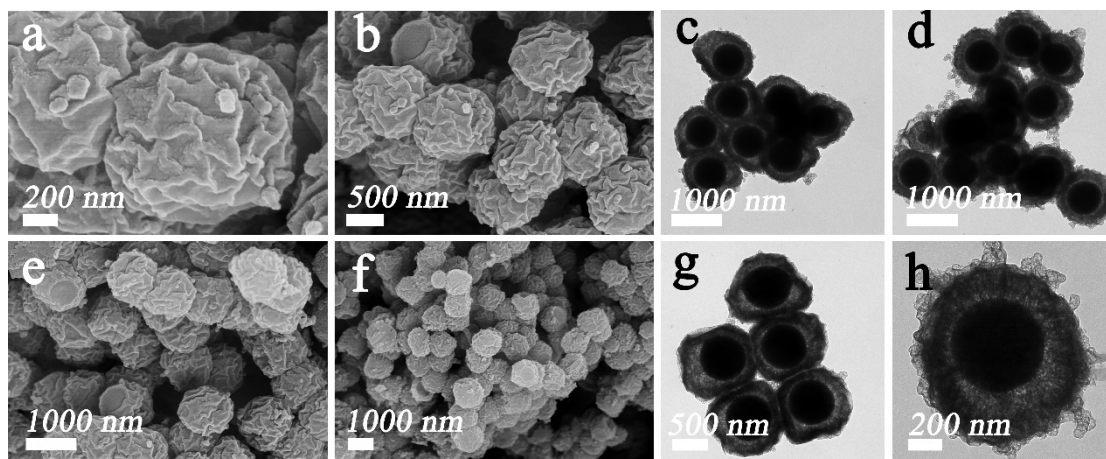

**Figure S2.** FE-SEM (a, b, e, f) and TEM (c, d, g, h) images of NMHCSs-0.4-55-15 synthesized by nanoemulsion polymerization in the microbalance system of micelles and vesicles.

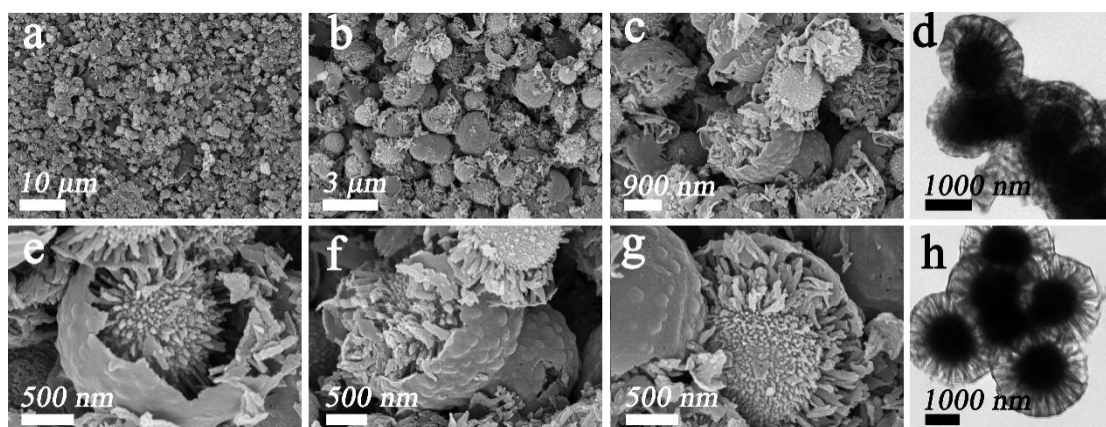

**Figure S3.** FE-SEM (a, b, c, e, f, g) and TEM (c, h) images of NMHCSs-0.4-50-25 synthesized by nanoemulsion polymerization in the microbalance system of micelles and vesicles.

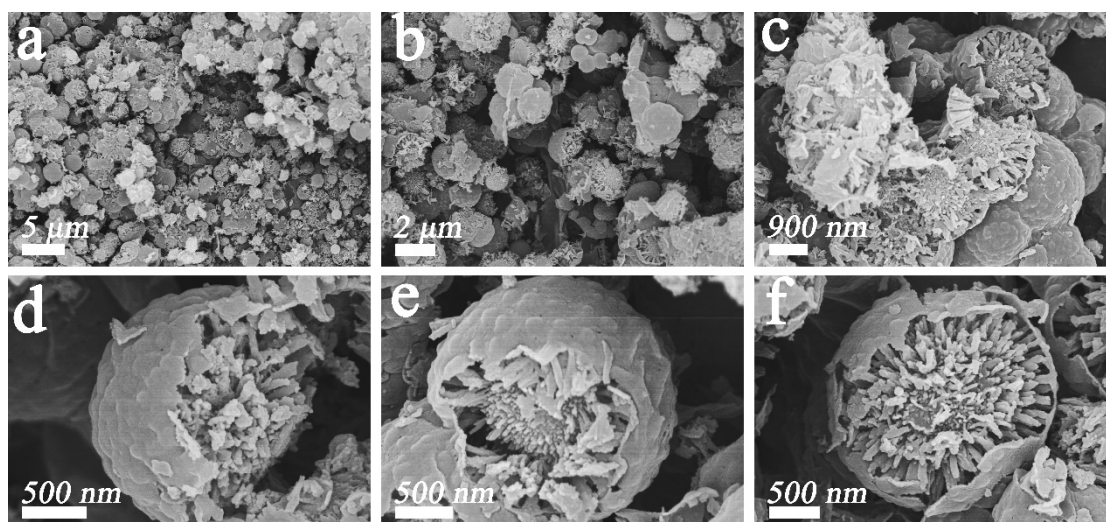

**Figure S4.** FE-SEM images of open structured hemispheric A-NMHCSs activated by KOH with chrysanthemum-like mesoporous core and ultrathin mesoporous shell.

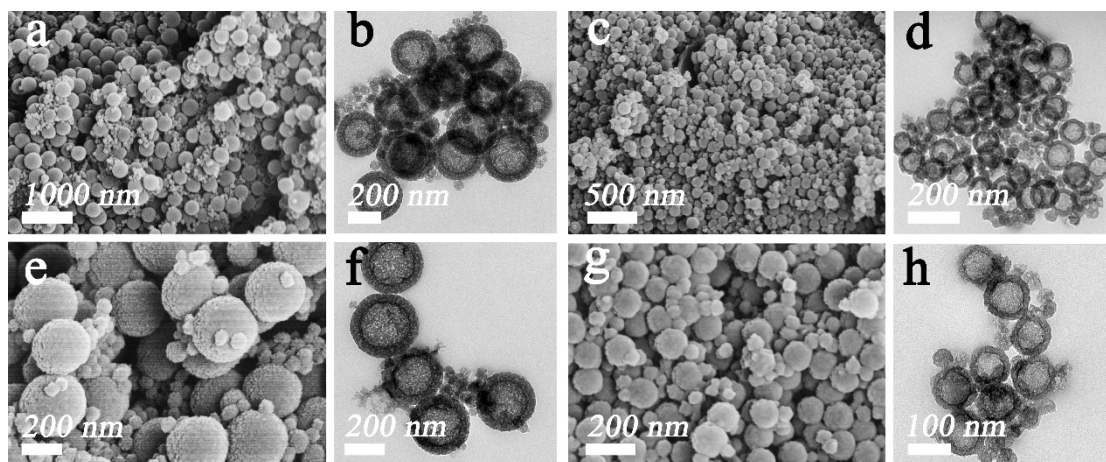

**Figure S5.** TEM and FE-SEM images of (a, b, e, f) NMHCSs-1.2-55-0 and (c, d, g, h) NMHCSs-1.2-95-0 synthesized by nanoemulsion polymerization in the microbalance system of micelles and vesicles.

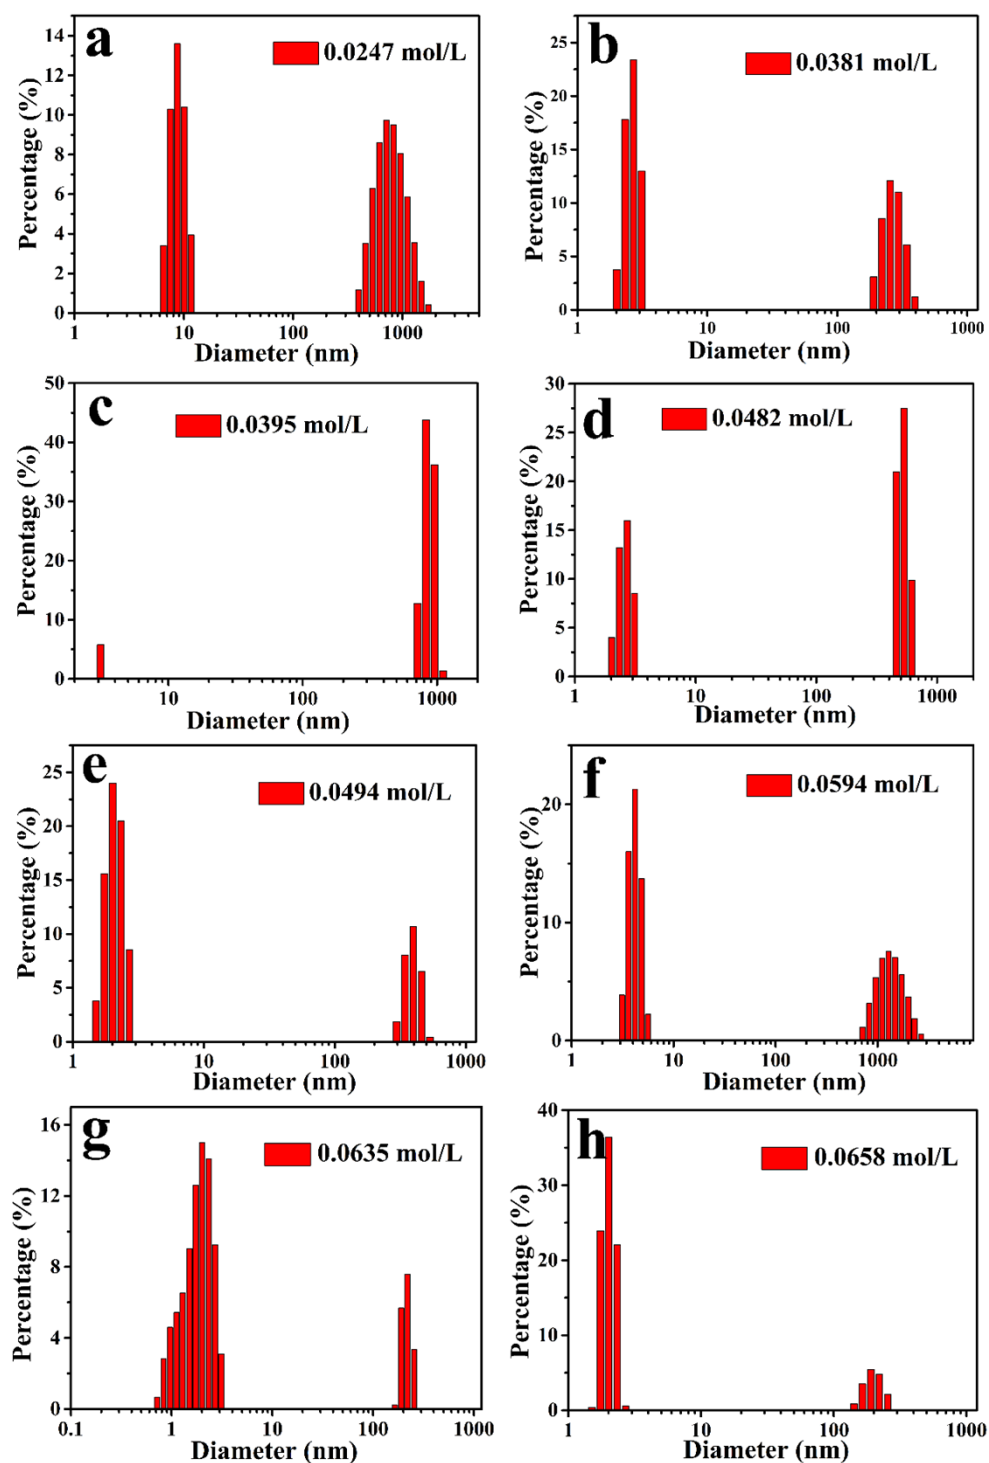

**Figure S6.** The size distribution for the assemble of ionic liquid surfactant  $[C_{12}mim]Br$  with different concentrations in the mixture of water and ethanol obtained by DLS

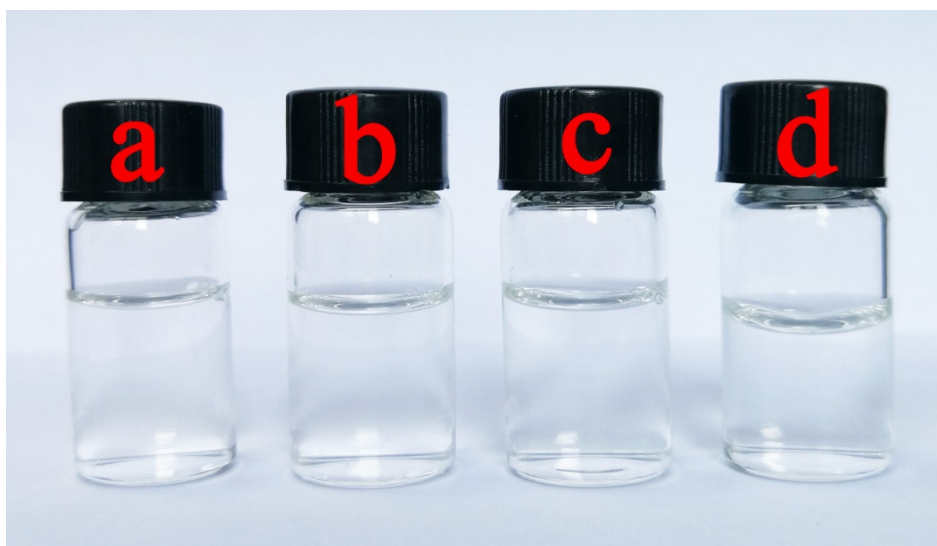

**Figure S7.** The photos of the aggregates of  $[C_{12}mim]Br$  in the mixture of water and ethanol collected from the reaction systems of the synthesized NMHCSs-1.2-95-0 (a), NMHCSs-1.2-55-0 (b), NMHCSs-1.2-55-6 (c) and NMHCSs-0.4-50-25 (d).

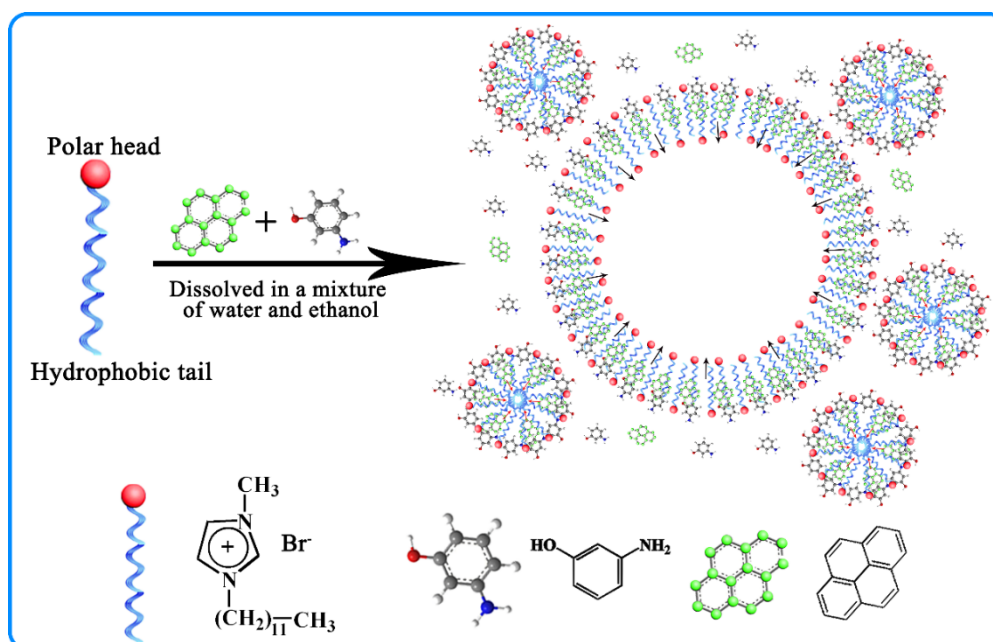

**Figure S8.** Pyrene fluorescence probe spectrometry characterizes the process of 3-aminophenol compatibilize to the micelles and vesicles of ionic liquid  $[C_{12}mim]Br$ .

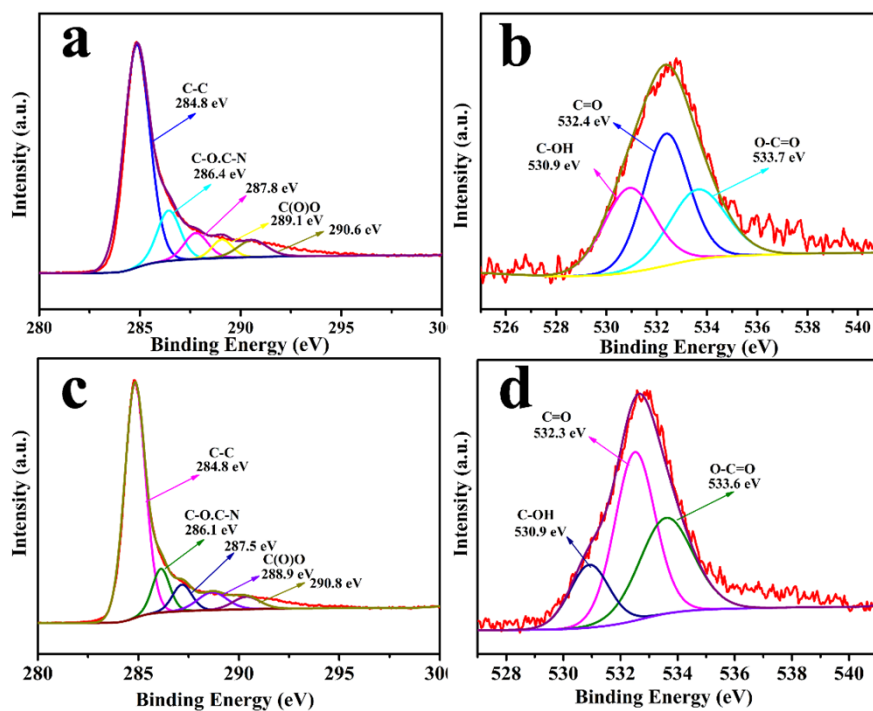

**Figure S9.** High-resolution spectra of the C 1s, N 1s and O 1s of NMHCSs-1.2-55-6 (a, b) and NMHCSs-b (c, d).

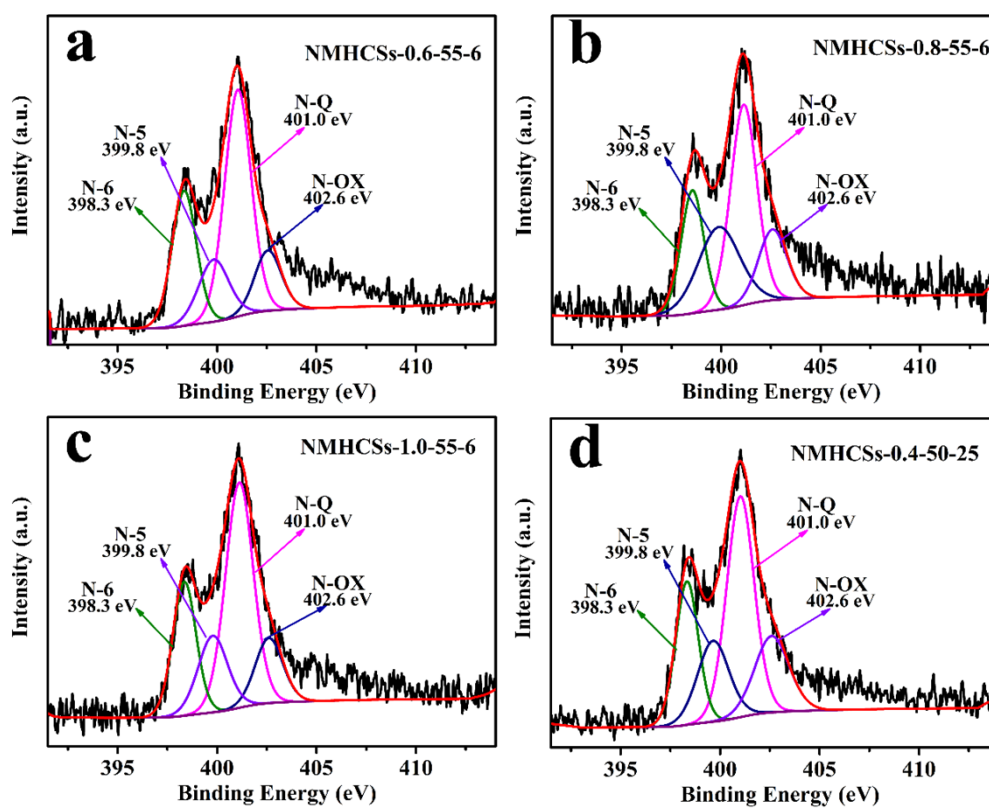

**Figure S10.** Fitted high-resolution XPS spectra of N 1s for NMHCSs-0.6-55-6 (a), NMHCSs-0.8-55-6 (b), NMHCSs-1.0-55-6 (c) and NMHCSs-0.4-50-25 (d).



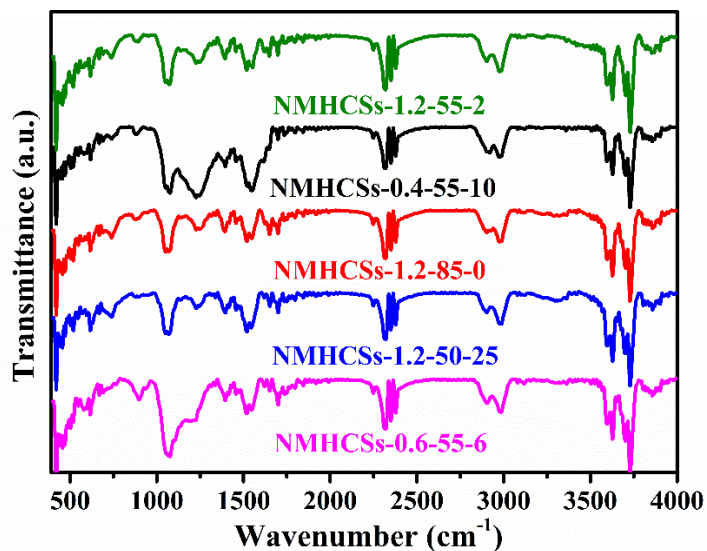

**Figure S11.** FT-IR spectrums of NMHCSs (NMHCSs-1.2-55-2, NMHCSs-1.2-0.4-55-10, NMHCSs-1.2-85-0, NMHCSs-1.2-50-25 and NMHCSs-0.6-55-6).

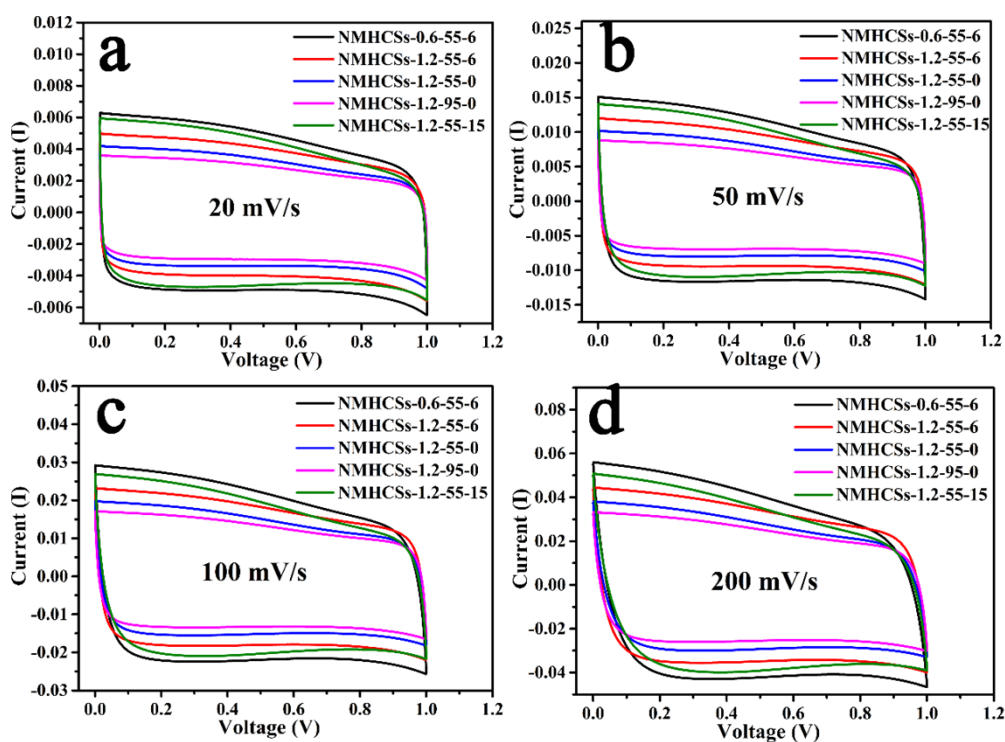

**Figure S12.** Cyclic voltammograms curves of the prepared NMHCSs (NMHCSs-0.6-55-6, NMHCSs-1.2-55-6, NMHCSs-1.2-55-0, NMHCSs-1.2-95-0 and NMHCSs-1.2-5-15) at the scan rate of 20-200  $\text{mV s}^{-1}$ .

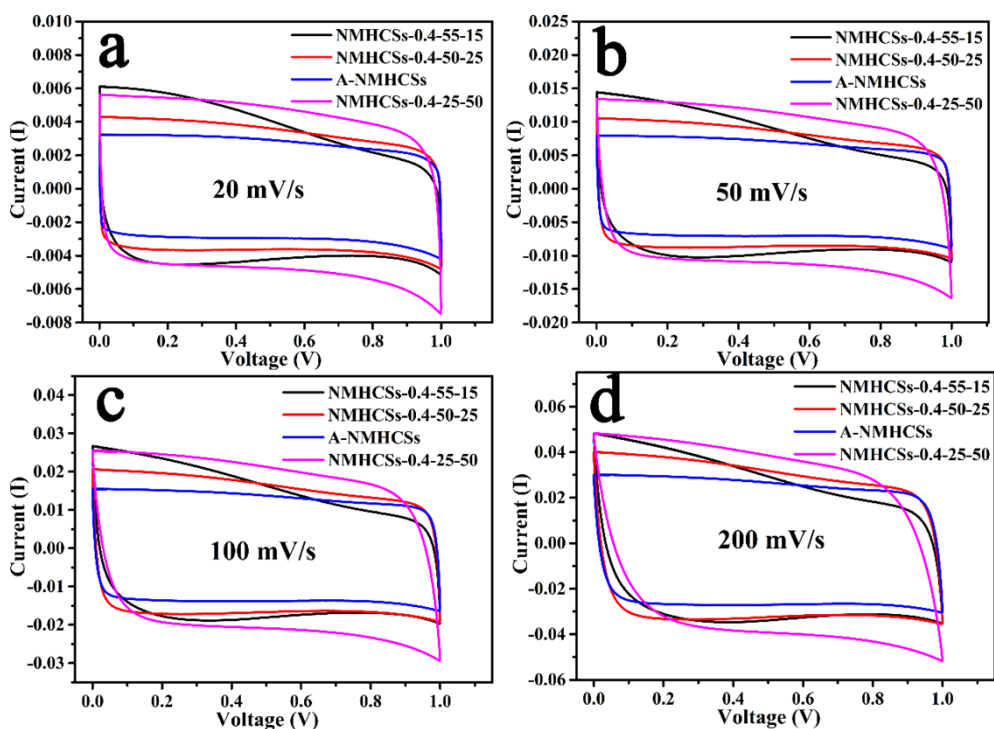

**Figure S13.** Cyclic voltammograms curves of the prepared NMHCSs (NMHCSs-0.4-55-15, NMHCSs-0.4-50-25, A-NMHCSs and NMHCSs-0.4-25-50) at the scan rate of 20-200  $\text{mV s}^{-1}$ .

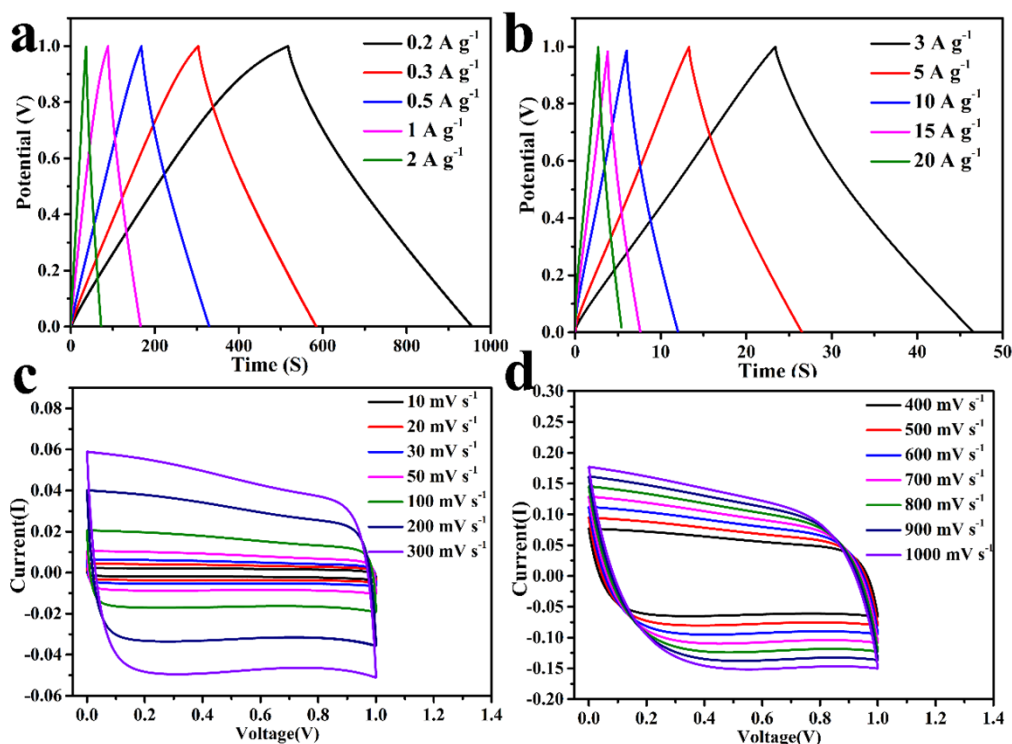

**Figure S14.** Electrochemical performance of NMHCSs-0.4-50-25 in 6 M KOH electrolyte in a two-electrode system; (a, b) Galvanostatic charge-discharge curves at the current density of 0.2-20  $\text{A g}^{-1}$ ; (c, d) CV curves at the scan rate of 10-1000  $\text{mV s}^{-1}$ .

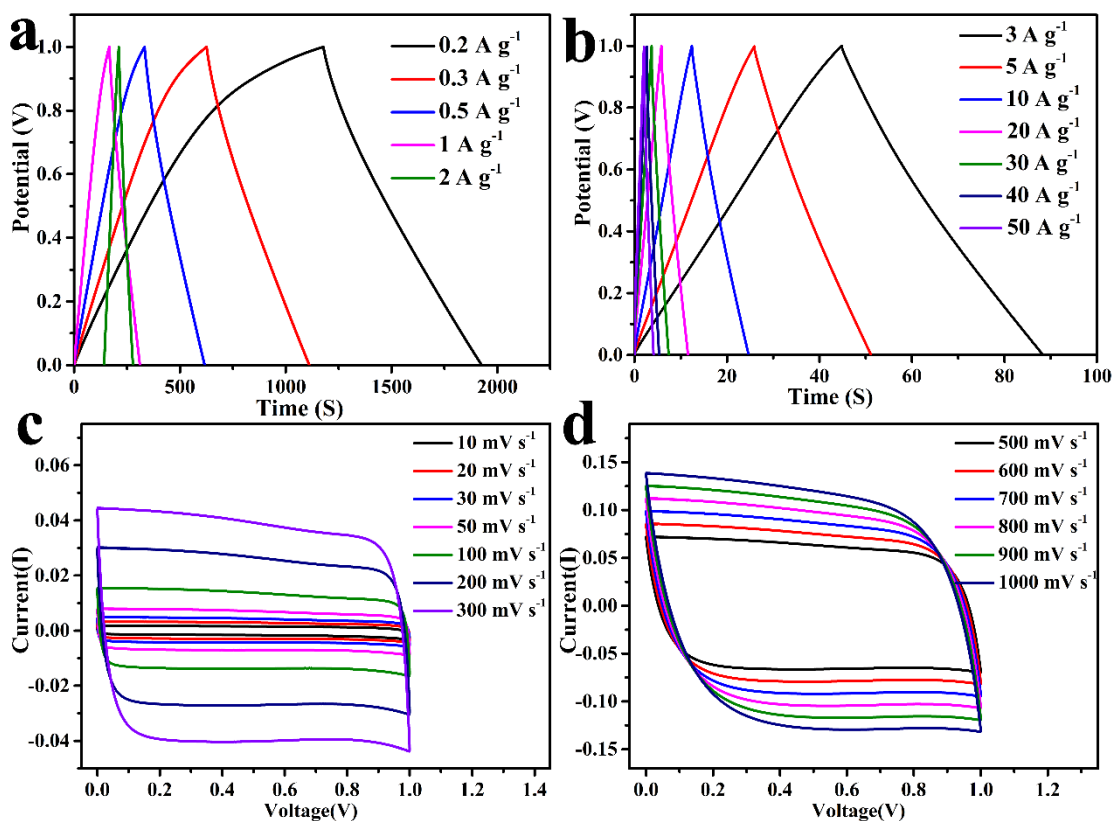

**Figure S15.** Electrochemical performance of A-NMHCSs in 6 M KOH electrolyte in a two-electrode system; (a, b) Galvanostatic charge-discharge curves at the current density of 0.2-50 A g<sup>-1</sup>; (c, d) CV curves at the scan rate of 10-1000 mV s<sup>-1</sup>.

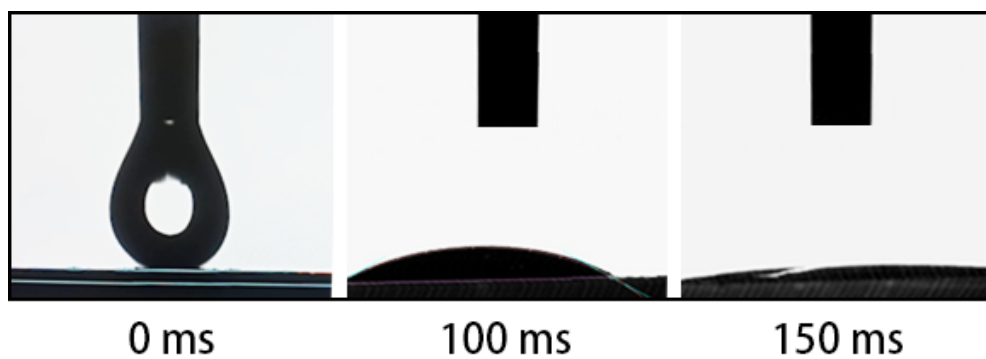

**Figure S16.** Wettability of electrolyte on the surface of the prepared electrode materials (A-NMHCSs).

---

## Reference:

- 1 C. Li, X. Zhang, Z. Lv, K. Wang, X. Sun, X. Chen and Y. Ma, *Chem. Eng. J.*, 2021, **414**, 128781.
- 2 X. Hong, X. Wang, Y. Li, C. Deng and B. Liang, *Electrochim. Acta*, 2021, 139571.
- 3 C. Huettner, F. Xu, S. Paasch, C. Kensy, Y. X. Zhai, J. Yang, E. Brunner and S. Kaskel, *Carbon*, 2021, **178**, 540–551.
- 4 M. Majumder, A. K. Thakur, M. Bhushan and D. Mohapatra, *Electrochim. Acta*, 2021, **370**, 137659.
- 5 M. Zhao, M. Shi, H. Zhou, Z. Zhang, W. Yang, Q. Ma and X. Lu, *Electrochim. Acta*, 2021, **390**, 138783.
- 6 W. Zhang, B. Liu, M. Yang, Y. Liu, H. Li and P. Liu, *J. Mater. Sci. Technol.*, 2021, **95**, 105–113.
- 7 B. Yao, H. Peng, H. Zhang, J. Kang, C. Zhu, G. Delgado, D. Byrne, S. Faulkner, M. Freyman, X. Lu, M. A. Worsley, J. Q. Lu and Y. Li, *Nano Lett.*, 2021, **21**, 3731–3737.
- 8 J. Cui, J. Yin, J. Meng, Y. Liu, M. Liao, T. Wu, M. Dresselhaus, Y. Xie, J. Wu, C. Lu and X. Zhang, *Nano Lett.*, 2021, **21**, 2156–2164.
- 9 R. Fu, C. Yu, S. Li, J. Yu, Z. Wang, W. Guo, Y. Xie, L. Yang, K. Liu, W. Ren and J. Qiu, *Green Chem.*, 2021, **23**, 3400–3409.
